# Supplementary material for: Orexin receptors exert a neuroprotective effect in Alzheimer’s disease (AD) via heterodimerization with GPR103
Source: PubMed Central journal article supplement (PMC4519789; doi:10.1038/srep12584), 2015-07-30
Supplement: srep12584-s1.pdf [file srep12584-s1.pdf]

**Orexin receptors exert a neuroprotective effect in Alzheimer's disease (AD) via heterodimerization with GPR103**

J. Davies<sup>1</sup>, J. Chen<sup>2,3</sup>, R. Pink<sup>4</sup>, D. Carter<sup>4</sup>, N. Saunders<sup>5</sup>, G. Sotiriadis<sup>1</sup>, B. Bai<sup>3</sup>, Y. Pan<sup>3</sup>, D. Howlett<sup>6</sup>, A. Payne<sup>7</sup>, H. Randeve<sup>2</sup>, E. Karteris<sup>1</sup>

| KEGG pathway                            | Number of genes involved | Genes involved                                 |
|-----------------------------------------|--------------------------|------------------------------------------------|
| Metabolic pathways                      | 8                        | PTGES, NAGLU, LALBA, GCDH, FTCD, DLST, ALOX12B |
| Neuroactive ligand-receptor interaction | 7                        | GALR3, GRIN1, HRH4, HTR4, PTGER1, SSTR3, VIPR1 |
| MAPK signalling pathway                 | 5                        | FGFR4, IL1B, MAP3K14, MAPT, RASGRP1            |
| NF-KB signalling pathway                | 5                        | BTK, IL1B, MAP3K14, SYK, TNFAIP3               |
| TNF signalling pathway                  | 4                        | EDN1, IL1B, MAP3K14, TNFAIP3                   |
| Osteoclast differentiation              | 4                        | BTK, IL1B, MAP3K14, SYK                        |
| PI3K-Akt signalling pathway             | 4                        | FGFR4, GNG13, SYK, TSC1                        |
| Cytokine-cytokine receptor interaction  | 4                        | CCR8, IL1B, IL8RA, TNFRSF19                    |
| Ras signalling pathway                  | 4                        | FGFR4, GNG13, GRIN1, RASGRP1                   |
| Glutamatergic synapse                   | 3                        | DLGAP1, GNG13, GRIN1                           |
| Chemokine signalling pathway            | 3                        | CCR8, GNG13, IL8RA                             |
| Calcium signalling pathway              | 3                        | GRIN1, HTR4, PTGER1                            |
| Alzheimer's disease                     | 3                        | GRIN1, IL1B, MAPT                              |
| Serotonergic synapse                    | 3                        | ALOX12B, GNG13, HTR4                           |

**Supplementary Table 1:** KEGG pathways associated with OXA treatment in SH-SY5Y

| KEGG pathway                            | Number of genes involved | Genes involved                                                                                      |
|-----------------------------------------|--------------------------|-----------------------------------------------------------------------------------------------------|
| Metabolic pathways                      | 16                       | THTPA, SDS, PTGES2, PPOX, PLCG2, PIGO, IVD, GPT, FUK, CSAD, B3GAT3, AUH, ALG10, AKR1A1, AGXT, ACAA1 |
| PI3K-Akt signalling pathway             | 10                       | CCND3, CSF3R, DDIT4, EPO, FGFR4, GNG13, ITGA3, JAK2, LAMB2, SYK                                     |
| Neuroactive ligand-receptor interaction | 10                       | AVPR1B, CHRND, CRHR1, DRD3, GRM4, HTR4, NMUR1, P2RY6, PTGER1, SSTR3                                 |
| Pathways in cancer                      | 8                        | CSF3R, HHIP, ITGA3, KLK3, LAMB2, PLCG2, STAT5A, WNT11                                               |
| Jak-STAT signalling pathway             | 7                        | CCND3, CSF2RB, CSF3R, EPO, IL22RA1, JAK2, STAT5A                                                    |
| Biosynthesis of secondary metabolites   | 6                        | ACAA1, AGXT, AKR1A1, DHDDS, PPOX, SDS                                                               |
| Cytokine-cytokine receptor interaction  | 6                        | CCR10, CSF2RB, CSF3R, EPO, IL22RA1, TNFSF14                                                         |
| Calcium signalling pathway              | 5                        | AVPR1B, CACNA1C, HTR4, PLCG2, PTGER1                                                                |
| Vascular smooth muscle contraction      | 5                        | ADCY6, AVPR1B, CACNA1C, PPP1R12C, PRKCD                                                             |
| Hematopoietic cell lineage              | 5                        | CD2, CD8B, CSF3R, EPO, ITGA3                                                                        |
| Glutamatergic synapse                   | 5                        | ADCY6, CACNA1C, GNG13, GRM4, SLC1A6                                                                 |
| Peroxisome                              | 5                        | ABCD4, ACAA1, AGXT, PECR, SLC27A2                                                                   |
| Cholinergic synapse                     | 5                        | ADCY6, CACNA1C, GNG13, JAK2, KCNQ2                                                                  |
| Ras signaling pathway                   | 4                        | FGFR4, GNG13, PLCG2, RASA4                                                                          |
| Dilated cardiomyopathy                  | 4                        | ADCY6, CACNA1C, ITGA3, LMNA                                                                         |

|                              |   |                               |
|------------------------------|---|-------------------------------|
| Chemokine signalling pathway | 4 | ADCY6, CCR10, GNG13, JAK2     |
| Focal adhesion               | 4 | CCND3, ITGA3, LAMB2, PPP1R12C |
| Cell adhesion molecules      | 4 | CD2, CD8B, LRR4, PTPRF        |
| HIF-1 signalling pathway     | 3 | EPO, PLCG2, TF                |
| Alzheimer's disease          | 1 | CACNA1C                       |

**Supplementary Table 2:** KEGG pathways associated with OXB treatment in SH-SY5Y

| KEGG pathway                                   | Number of genes involved | Genes involved                                                                                                                                                                   |
|------------------------------------------------|--------------------------|----------------------------------------------------------------------------------------------------------------------------------------------------------------------------------|
| <b>Neuroactive ligand-receptor interaction</b> | 26                       | ADRA1A, ADRA1B, AVPR2, CHRM5, CHRND, DRD3, GALR3, GCGR, GHRHR, GHSR, GLRA1, GRM4, GZMA, HCRTR1, HRH1, HRH3, MC3R, OPRM1, P2RX1, P2RX3, P2RX7, P2RY11, SSTR3, SSTR4, TBXA2R, TSHR |
| <b>Metabolic pathways</b>                      | 24                       | ABO, ACAA1, ALG10, ALOX12, ALOX12B, ALOX15, ALOX15B, CYP4A11, CYP4F8, DPYS, EHHADH, FAHD1, FLAD1, FUK, IDUA, LTC4S, MVD, NDUFS7, NNMT, PCYT2, PKLR, PLCG2, PRODH, SDS            |
| <b>Cytokine-cytokine receptor interaction</b>  | 21                       | CCL20, CCL3, CCL4, CCL5, CCR4, CSF2, CSF2RB, CSF3, CSF3R, EPO, IL11, IL17E, IL21, IL22, IL3RA, IL6, PDGFB, TNFSF14, TNFSF15, TNFSF18, XCR1                                       |
| <b>Calcium signalling pathway</b>              | 19                       | ADRA1A, ADRA1B, CACNA1A, CACNA1B, CACNA1I, CACNA1H, CHRM5, ERBB2, ERBB3, GNA14, HRH1, ITPR1, P2RX1, P2RX3, P2RX7, PLCG2, PLN, RYR3, TBXA2R                                       |
| <b>PI3K-Akt signalling pathway</b>             | 16                       | BCL2L11, CCND3, CHAD, CSF3, CSF3R, EPO, FGFR4, IL3RA, IL6, INS, ITGA11, ITGB4, JAK3, LAMC3, MYB, PDGFB                                                                           |
| <b>Jak-STAT signalling pathway</b>             | 14                       | CCND3, CSF2, CSF2RB, CSF3, CSF3R, EPO, IL11, IL21, IL22, IL3RA, IL6, JAK3, SOCS5, STAT5A                                                                                         |

|                                                |    |                                                                                                       |
|------------------------------------------------|----|-------------------------------------------------------------------------------------------------------|
| <b>Hematopoietic cell lineage</b>              | 14 | CD2, CD34, CD37, CD4, CD8A, CD8B, CSF2, CSF3, CSF3R, EPO, GP9, IL11, IL3RA, IL6                       |
| <b>HTLV-I infection</b>                        | 14 | ATF3, CCND3, CSF2, E2F1, FZD3, IL6, JAK3, MYB, NRP1, PCAF, PDGFB, STAT5A, TERT, XBP1                  |
| <b>Pathways in cancer</b>                      | 13 | ARNT, CSF3R, E2F1, ERBB2, FZD3, IL6, KLK3, LAMC3, PAX8, PDGFB, PLCG2, STAT5A, STK4                    |
| <b>MAPK signalling pathway</b>                 | 13 | CACNA1A, CACNA1B, CACNA1H, CACNA1I, CACNA2D3, CACNB2, CACNG5, FGFR4, MAP3K5, MEF2C, PDGFB, STK3, STK4 |
| <b>Regulation of actin cytoskeleton</b>        | 11 | CHRM5, FGD3, FGFR4, GRLF1, INS, ITGA11, ITGB4, MYL2, MYL5, MYL9, PDGFB                                |
| <b>Proteoglycans in cancer</b>                 | 11 | ERBB2, ERBB3, FZD3, GAB1, GPC3, HSPB2, HSPG2, ITPR1, NUDT16L1, PLCG2, TIMP3                           |
| <b>Focal adhesion</b>                          | 11 | CCND3, CHAD, ERBB2, GRLF1, ITGA11, ITGB4, LAMC3, MYL2, MYL5, MYL9, PDGFB                              |
| <b>Ras signalling pathway</b>                  | 9  | FGFR4, GAB1, INS, PDGFB, PLCG2, RASA4, RASAL2, REL, STK4                                              |
| <b>Chemokine signalling pathway</b>            | 9  | CCL20, CCL3, CCL4, CCL5, CCR4, FGR, HCK, JAK3, XCR1                                                   |
| <b>Maturity onset diabetes of the young</b>    | 8  | FOXA2, INS, NKX2, NR5A2, PAX4, PAX6, PKLR, TCF1                                                       |
| <b>MicroRNAs in cancer</b>                     | 8  | BCL2L11, E2F1, ERBB2, ERBB3, FZD3, PDGFB, PLCG2, TIMP3                                                |
| <b>Serotonergic synapse</b>                    | 8  | ALOX12, ALOX12B, ALOX15, LOX15B, CACNA1A, CACNA1B, ITPR1, KCNJ5                                       |
| <b>Transcriptional misregulation in cancer</b> | 8  | CEBPE, CSF2, GZMB, IL6, MEF2C, MPO, PAX8, REL                                                         |
| <b>ECM-receptor interaction</b>                | 8  | CD47, CHAD, GP6, GP9, HSPG2, ITGA11, ITGB4, LAMC3                                                     |
| <b>Salivary secretion</b>                      | 7  | ADRA1A, ADRA1B, AQP5, CAMP, FXD2, ITPR1, RYR3                                                         |
| <b>Non-alcoholic fatty liver disease</b>       | 7  | BCL2L11, IL6, INS, MAP3K5, NDUFS7, PKLR, XBP1                                                         |
| <b>Biosynthesis of secondary metabolites</b>   | 7  | ACAA1, ACOT7, MVD, NAGK, PDSS2, PRODH, SDS                                                            |
| <b>Arachidonic acid metabolism</b>             | 7  | ALOX12, ALOX12B, ALOX15, ALOX15B, CYP4A11, CYP4F8, LTC4S                                              |

|                                                         |   |                                               |
|---------------------------------------------------------|---|-----------------------------------------------|
| <b>Primary immunodeficiency</b>                         | 7 | AIRE, BLNK, BTK, CD4, CD79A, CD8A, CD8B       |
| <b>Cell adhesion molecules</b>                          | 7 | CD2, CD34, CD4, CD8A, CD8B, MAG, SDC3         |
| <b>Natural killer cell mediated cytotoxicity</b>        | 6 | CSF2, GZMB, NCR2, NCR3, PLCG2, SH3BP2         |
| <b>Arrhythmogenic right ventricular cardiomyopathy</b>  | 6 | CACNA2D3, CACNB2, CACNG5, ITGA11, ITGB4, LMNA |
| <b>HIF-1 signalling pathway</b>                         | 6 | ARNT, EPO, ERBB2, IL6, INS, PLCG2             |
| <b>Protein processing in endoplasmic reticulum</b>      | 6 | DNAJC1, MAP3K5, MBTPS2, PPP1R15A, SSR1, XBP1  |
| <b>Complement and coagulation cascades</b>              | 6 | C1QA, C2, F3, PROC, SERPINF2, THBD            |
| <b>Dopaminergic synapse</b>                             | 6 | CACNA1A, CACNA1B, DRD3, ITPR1, KCNJ5, PPP1R1B |
| <b>Inflammatory mediator regulation of TRP channels</b> | 6 | ALOX12,HRH1, ITPR1, PLCG2, PRKCD, TRPV4       |
| <b>Glutamatergic synapse</b>                            | 6 | CACNA1A, GRM4, ITPR1, SLC1A1, SLC1A6, SLC1A7  |
| <b>TNF signalling pathway</b>                           | 6 | CCL20, CCL5, CSF2, IL6, MAP3K5, MMP14         |
| <b>Rheumatoid arthritis</b>                             | 6 | CCL20, CCL3, CCL5, CSF2, IL11, IL6            |
| <b>ABC transporters</b>                                 | 6 | ABCA1, ABCA5, ABCB9, ABCD4, ABCG1, ABCG2      |
| <b>Cardiac muscle contraction</b>                       | 6 | CACNA2D3, CACNB2, CACNG5, FXD2, MYL2, MYL3    |
| <b>Cholinergic synapse</b>                              | 6 | CACNA1A, CACNA1B, CHRM5, ITPR1, KCNQ4, KCNJ4  |
| <b>NF-kappa B signalling pathway</b>                    | 5 | BLNK, BTK,CCL4,PLCG2, TNFSF14                 |
| <b>Alzheimer's disease</b>                              | 3 | ITPR1, NDUFS7, RYR3                           |

**Supplementary Table 3:** KEGG pathways associated with QRFP treatment in SH-SY5Y

| <b>Molecular Functions (GOTERMS-OXA treatment)</b>                  | <b>Gene Count in pathway</b> | <b>% of total in pathway</b> | <b>p-value</b> |
|---------------------------------------------------------------------|------------------------------|------------------------------|----------------|
| solute:hydrogen symporter activity                                  | 4                            | 0.9                          | 1.50E-02       |
| solute:cation symporter activity                                    | 7                            | 1.6                          | 1.50E-02       |
| symporter activity                                                  | 8                            | 1.8                          | 2.70E-02       |
| antigen binding                                                     | 5                            | 1.1                          | 3.10E-02       |
| alanine-oxo-acid transaminase activity                              | 2                            | 0.5                          | 4.20E-02       |
| L-alanine:2-oxoglutarate aminotransferase activity                  | 2                            | 0.5                          | 4.20E-02       |
| sugar:hydrogen symporter activity                                   | 3                            | 0.7                          | 4.40E-02       |
| cation:sugar symporter activity                                     | 3                            | 0.7                          | 4.40E-02       |
| <b>Molecular Functions (GOTERMS-OXB treatment)</b>                  | <b>Gene Count in pathway</b> | <b>% of total in pathway</b> | <b>p-value</b> |
| metal ion transmembrane transporter activity                        | 31                           | 2.9                          | 1.50E-03       |
| pyridoxal phosphate binding                                         | 10                           | 0.9                          | 1.60E-03       |
| vitamin B6 binding                                                  | 10                           | 0.9                          | 1.60E-03       |
| enzyme activator activity                                           | 31                           | 2.9                          | 2.10E-03       |
| potassium ion binding                                               | 15                           | 1.4                          | 5.90E-03       |
| potassium channel activity                                          | 15                           | 1.4                          | 8.30E-03       |
| di-, tri-valent inorganic cation transmembrane transporter activity | 7                            | 0.7                          | 1.40E-02       |
| metal ion binding                                                   | 239                          | 22.2                         | 1.60E-02       |
| cation binding                                                      | 241                          | 22.4                         | 1.70E-02       |
| protein kinase binding                                              | 15                           | 1.4                          | 1.90E-02       |
| kinase binding                                                      | 17                           | 1.6                          | 2.20E-02       |
| calcium ion binding                                                 | 62                           | 5.8                          | 2.20E-02       |
| fibroblast growth factor receptor activity                          | 3                            | 0.3                          | 2.40E-02       |

|                                                         |                              |                              |                |
|---------------------------------------------------------|------------------------------|------------------------------|----------------|
| endodeoxyribonuclease activity                          | 5                            | 0.5                          | 2.40E-02       |
| cation channel activity                                 | 23                           | 2.1                          | 2.60E-02       |
| ion binding                                             | 242                          | 22.5                         | 2.60E-02       |
| deoxyribonuclease activity                              | 6                            | 0.6                          | 2.80E-02       |
| vitamin binding                                         | 13                           | 1.2                          | 3.50E-02       |
| voltage-gated cation channel activity                   | 14                           | 1.3                          | 3.90E-02       |
| enzyme binding                                          | 37                           | 3.4                          | 4.40E-02       |
| alkali metal ion binding                                | 19                           | 1.8                          | 4.60E-02       |
| transition metal ion transmembrane transporter activity | 5                            | 0.5                          | 4.70E-02       |
| <b>Molecular Functions (GOTERMS-QRFP treatment)</b>     | <b>Gene Count in pathway</b> | <b>% of total in pathway</b> | <b>p-value</b> |
| peptidase activity                                      | 39                           | 4.3                          | 6.20E-03       |
| enzyme activator activity                               | 26                           | 2.9                          | 7.10E-03       |
| voltage-gated calcium channel activity                  | 6                            | 0.7                          | 7.10E-03       |
| serine-type peptidase activity                          | 16                           | 1.8                          | 1.10E-02       |
| serine hydrolase activity                               | 16                           | 1.8                          | 1.20E-02       |
| calcium ion binding                                     | 56                           | 6.2                          | 1.20E-02       |
| tumor necrosis factor receptor binding                  | 5                            | 0.6                          | 1.30E-02       |
| cytokine activity                                       | 17                           | 1.9                          | 1.30E-02       |
| peptidase activity, acting on L-amino acid peptides     | 36                           | 4                            | 1.50E-02       |
| serine-type endopeptidase activity                      | 14                           | 1.5                          | 1.60E-02       |
| metal ion transmembrane transporter activity            | 24                           | 2.6                          | 1.80E-02       |
| cation channel activity                                 | 21                           | 2.3                          | 1.80E-02       |
| extracellular matrix constituent, lubricant activity    | 3                            | 0.3                          | 2.60E-02       |
| chemoattractant activity                                | 3                            | 0.3                          | 2.60E-02       |

|                                                     |    |     |          |
|-----------------------------------------------------|----|-----|----------|
| gated channel activity                              | 22 | 2.4 | 2.90E-02 |
| extracellular matrix structural constituent         | 9  | 1   | 3.30E-02 |
| transmembrane receptor protein phosphatase activity | 4  | 0.4 | 4.30E-02 |
| tumor necrosis factor receptor superfamily binding  | 5  | 0.6 | 4.70E-02 |

**Supplementary Table 4.** Gene Ontology (GO) terms for Molecular Function with significance at 1.5 fold change for OXA and OXB and at 2.0 fold difference for QRFP.



| Gene          | OXA              |               | OXB              |               | QRFP             |               |
|---------------|------------------|---------------|------------------|---------------|------------------|---------------|
|               | Microarray value | qPCR value    | Microarray value | qPCR value    | Microarray value | qPCR value    |
| <b>CSTF2T</b> | 2.41             | 1.42<br>±0.25 | 2.07             | 1.64<br>±0.05 | 2.58             | 1.48<br>±0.17 |
| <b>DAB2IP</b> | 1.60             | 1.38<br>±0.42 | 2.06             | 4.32<br>±0.51 | 2.15             | 2.24<br>±0.30 |
| <b>GPR148</b> | 0.48             | 0.97<br>±0.52 | 0.43             | 0.39<br>±0.11 | 0.47             | 0.66<br>±0.12 |
| <b>KRT23</b>  | 0.39             | 0.49<br>±0.09 | 0.33             | 0.80<br>±0.02 | 0.41             | 0.63<br>±0.17 |
| <b>OSBPL7</b> | 1.50             | 1.81<br>±0.15 | 1.58             | 2.02<br>±1.01 | 1.75             | 2.01<br>±0.73 |
| <b>PYCRL</b>  | 2.02             | 1.39<br>±0.16 | 1.86             | 1.59<br>±0.48 | 2.30             | 3.03<br>±0.30 |
| <b>ZFP42</b>  | 0.46             | 0.82<br>±0.04 | 0.48             | 0.77±<br>0.20 | 0.48             | 0.83<br>±0.05 |
| <b>ZP1</b>    | 2.20             | 1.47<br>±0.19 | 1.76             | 3.24<br>±0.33 | 3.43             | 3.36<br>±0.69 |

**Supplementary Table 5:** Values for 8 genes that were similarly regulated by all three neuropeptides obtained by microarray and qPCR validation upon 24 hour treatment with 100nM OXA, OXB or QRFP ±S.D.

| <b>Diagnosis</b> | <b>Age (years)</b> | <b>Sex</b> | <b>PM delay (hr)</b> |
|------------------|--------------------|------------|----------------------|
| EOFAD            | 66                 | F          | 8                    |
| EOFAD            | 64                 | M          | 79                   |
| EOFAD            | 58                 | M          | 28                   |
| EOFAD            | 64                 | M          | 39                   |
| EOFAD            | 65                 | M          | Not provided         |
| EOFAD            | 70                 | F          | 24                   |
| AD               | 84                 | F          | 29                   |
| AD               | 84                 | M          | 47                   |
| AD               | 83                 | F          | 12                   |
| AD               | 80                 | M          | 32                   |
| AD               | 88                 | F          | 84                   |
| AD               | 87                 | F          | 54                   |
| Con (young)      | 58                 | F          | 39                   |
| Con (young)      | 59                 | M          | 19                   |
| Con (young)      | 55                 | F          | 41                   |
| Con (old)        | 78                 | F          | 23                   |
| Con (old)        | 89                 | F          | 24                   |
| Con (old)        | 88                 | F          | 22                   |

**Supplementary Table 6.** Clinical details of patients (diagnosis, age in years, sex, and PM delay in hrs).

| <b>Gene</b>   | <b>Primer sequence<br/>5'→3'</b>                          | <b>Forward/Reverse</b> | <b>Amplicon size<br/>(bp)</b> |
|---------------|-----------------------------------------------------------|------------------------|-------------------------------|
| <i>OX1R</i>   | CCTGTGCCTCCAGA<br>CTATGA<br>ACACTGCTGCATTC<br>CATGAC      | F<br>R                 | 204                           |
| <i>OX2R</i>   | TAGTTCCTCAGCTG<br>CCTATC<br>CGTCCTCATGTGGT<br>GGTTCT      | F<br>R                 | 261                           |
| <i>GPR103</i> | CGCCTCCCTTCCTC<br>TACTCT<br>GAGATCGAGTCTCC<br>CAGTGC      | F<br>R                 | 141                           |
| <i>NSE</i>    | ATGCGACTAGGTGC<br>AGAGGT<br>GCTCCAAGGCTTCA<br>CTGTTC      | F<br>R                 | 133                           |
| <i>NES</i>    | AACAGCGACGGAG<br>GTCTCTA<br>TTCTCTTGCCGCA<br>GACTT        | F<br>R                 | 220                           |
| <i>NG1</i>    | ACGCCCTGTTTCAT<br>TCCTTAC<br>CCATCTATTGCCTG<br>CTGACTAG   | F<br>R                 | 81                            |
| <i>MAPT</i>   | TTTGGTGGTGGTTA<br>GAGATATGC<br>CCGAGGTGCGTGA<br>AGAAATG   | F<br>R                 | 72                            |
| <i>CSTF2T</i> | GCACAACCGGAATC<br>ATGTCTG<br>TTCCTGAGGCGAC<br>TCGTAGG     | F<br>R                 | 299                           |
| <i>DAB2IP</i> | AAAAGGAGGAACCC<br>AGACGC<br>TTTCTTGAGGCGAC<br>TCGTAGG     | F<br>R                 | 135                           |
| <i>GPR148</i> | GCTCCCATACCTGT<br>ACCTGC<br>GTAAAGATGGCCTG<br>GTGCCT      | F<br>R                 | 90                            |
| <i>KRT23</i>  | CTCCCACAGCAAAG<br>GCCATA<br>GAAGCTGTGTCCG<br>GAGTTCA      | F<br>R                 | 130                           |
| <i>OSBPL7</i> | GAGCCAGGCTATG<br>GGAACAT<br>AGATGGGCAGAAG<br>GGCAGTG      | F<br>R                 | 154                           |
| <i>PYCRL</i>  | TATGTCACITTTCAA<br>GCTCTGGGT<br>ATCACTATGGCCCC<br>TTCCTGG | F<br>R                 | 271                           |
| <i>ZFP42</i>  | TTACGTTTGGGAGG<br>AGGTGG<br>ACATTTGTTTCAGC<br>TCAGCGAT    | F<br>R                 | 229                           |
| <i>ZP1</i>    | CTGGAGAAGGATG<br>GGCGTTT<br>CAGAGTAGCGTCTT<br>GTGCCA      | F<br>R                 | 90                            |

**Supplementary Table 7.** List of primers used for qPCR analyses.

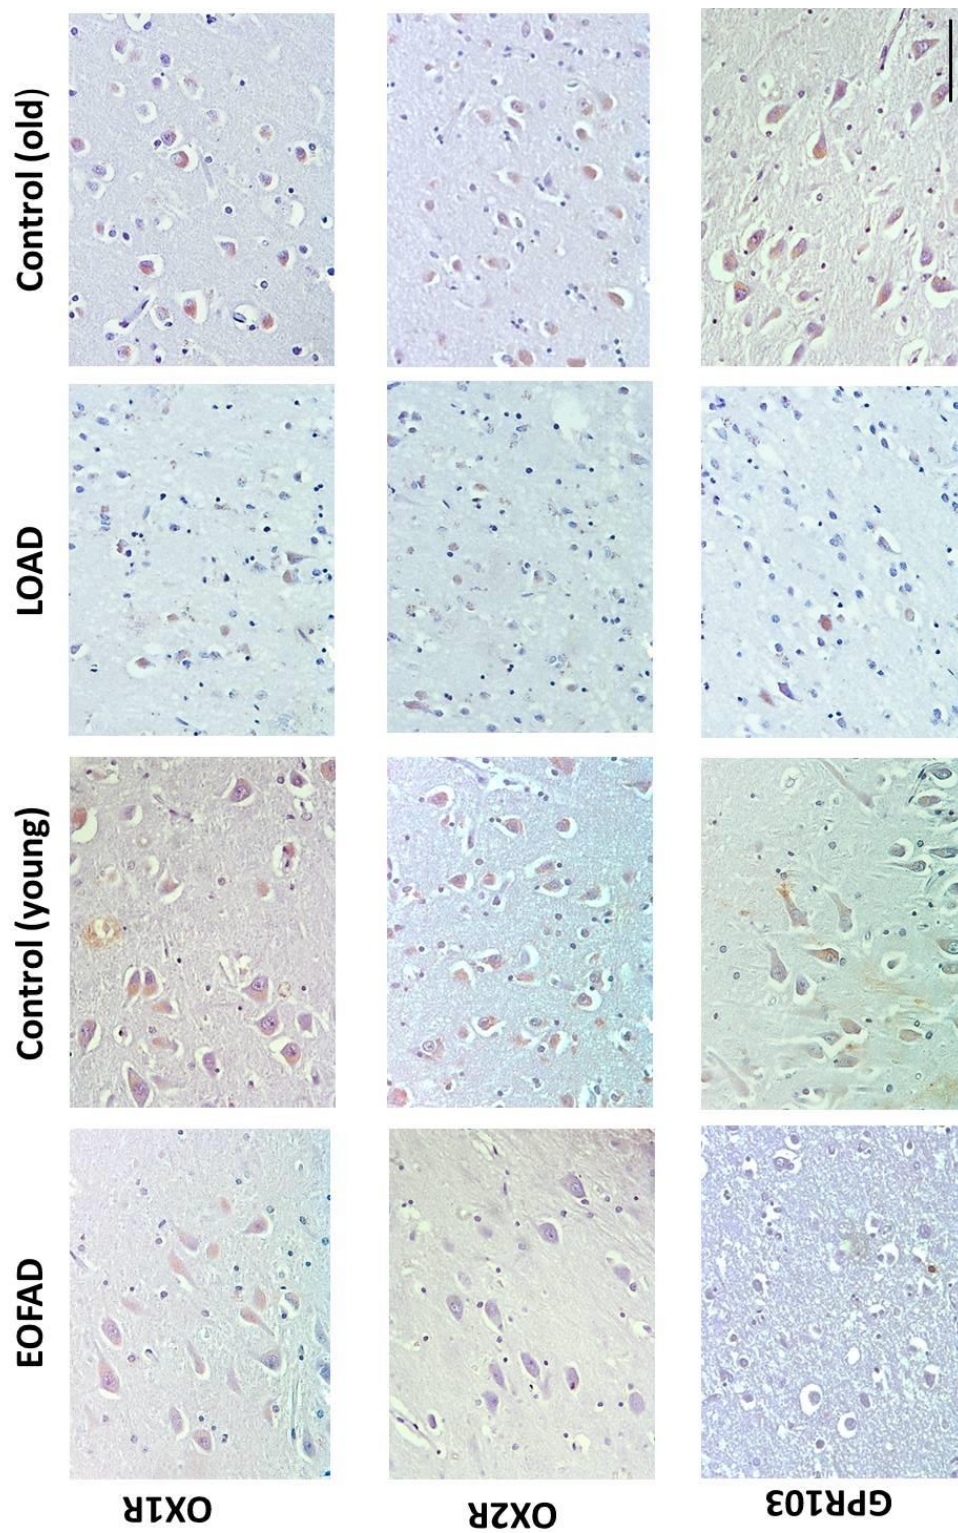

**Supplementary Figure 1.** Representative images of immunohistochemistry using DAB staining in EOFAD, LOAD and old and young control patients in the CA region with OX1R, OX2R or a GPR103 antibody. X40 magnification, bar = 100 $\mu$ M.

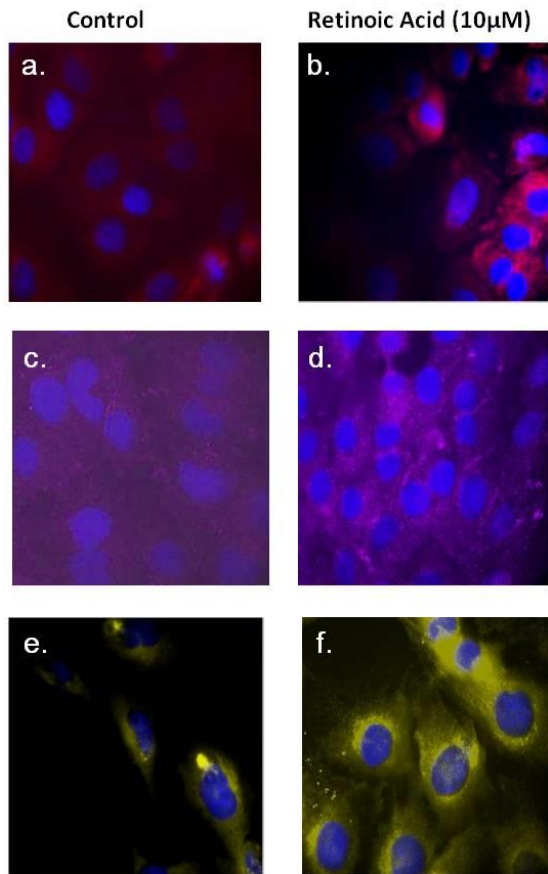

**Supplementary Figure 2.** Immunofluorescence using an OXIR (a, b) OX2R (c,d) and GPR103 (e,f) antibodies in SH-SY5Y cells before (a,c,e) and after differentiation (b, d, f) with retinoic acid. x40 magnification.

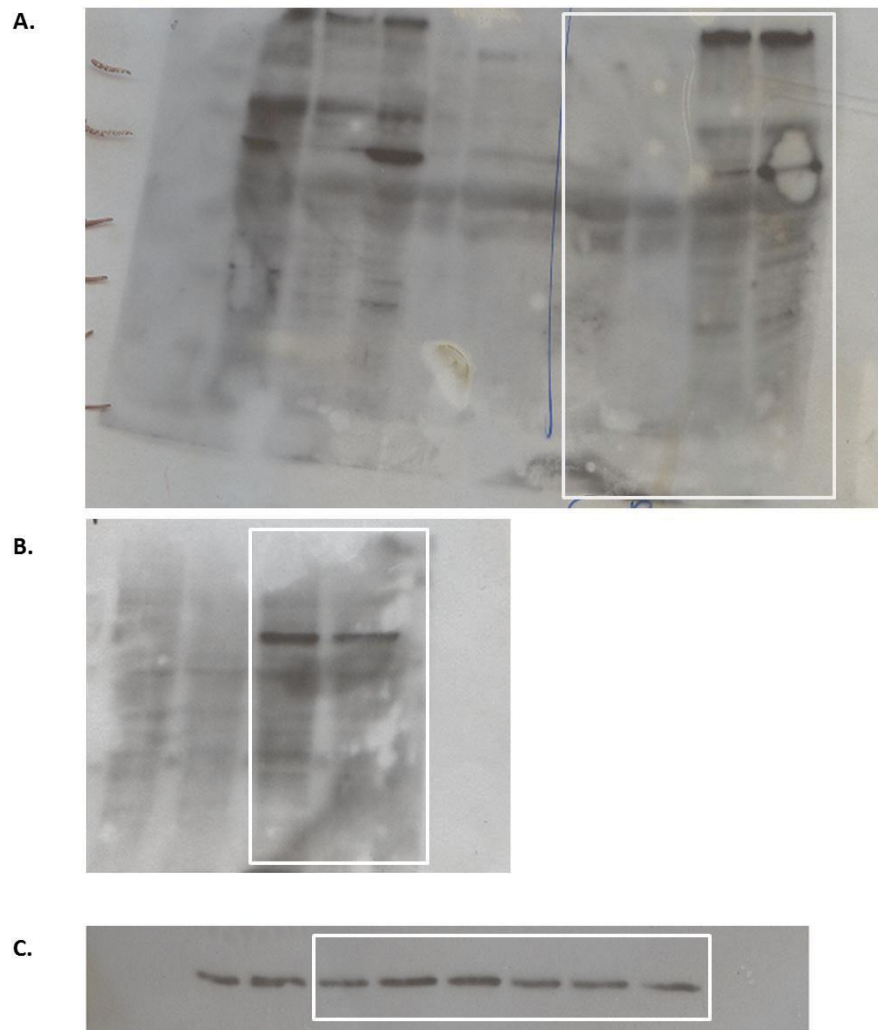

**Supplementary Figure 3.** Raw data for western blots for Figure 3: In white rectangle (panels A and B) images used for phospho-tau measurements. Panel C: immunoblots for GAPDH.

## **Supplementary Tables**

**Supplementary Table 1.** KEGG pathways associated with OXA treatment.

**Supplementary Table 2.** KEGG pathways associated with OXB treatment.

**Supplementary Table 3.** KEGG pathways associated with QRFP treatment.

**Supplementary Table 4.** Gene Ontology (GO) terms for Molecular Function with significance at 1.5 fold change for OXA and OXB and at 2.0 fold difference for QRFP.

**Supplementary Table 5.** Values for 8 genes obtained by microarray and qPCR validation upon 24 hour treatment with 100nM OXA, OXB or QRFP  $\pm$ S.D.

**Supplementary Table 6.** Clinical details of patients (diagnosis, age in years, sex, and PM delay in hrs).

**Supplementary Table 7.** List of primers used for qPCR analyses.

## **Supplementary Figures**

**Supplementary Figure 1.** Representative images of immunohistochemistry using DAB staining in EOFAD, LOAD and old and young control patients in the CA region with OX1R, OX2R or a GPR103 antibody. X40 magnification, bar = 100 $\mu$ M.

**Supplementary Figure 2.** Immunofluorescence using an OX1R (a, b) OX2R (c,d) and GPR103 (e,f) antibodies in SH-SY5Y cells before (a,c,e) and after differentiation (b, d, f) with retinoic acid. x40 magnification.

**Supplementary Figure 3.** Raw data for western blots for Figure 3: In white rectangle (panels A and B) images used for phospho-tau measurements. Panel C: immunoblots for GAPDH.
